# Supplementary material for: Preliminary Investigation of a Mobile Nutrition Literacy Website for Parents and Young Children
Source: Front Nutr. 2018 Dec 18;5:129. doi: 10.3389/fnut.2018.00129 (PMC6305458; doi:10.3389/fnut.2018.00129)
Supplement: Supplementary file 1 [file Data_Sheet_1.docx]

Supplementary Material

Mixed Methods Formative Evaluation of a Mobile Nutrition Literacy Training Program for Parents and Young Children

**Heather D. Gibbs1*, Juliana Camargo1, Susana Patton2, Jamie Zoellner3, Yvonnes Chen4, Ana Paula Cupertino5, Susan Harvey6, Byron Gajewski8, Debra K. Sullivan1**

1Department of Dietetics & Nutrition, Mail Stop 4013, University of Kansas Medical Center, Kansas City, KS, 66160, United States

2Department of Pediatrics, University of Kansas Medical Center, Kansas City, KS, United States

3 Department of Public Health Science, University of Virginia, Charlottesville, VA, United States

4 School of Journalism and Mass Communications, University of Kansas, Lawrence, KS, United States

5John Theurer Cancer Center, Hackensack Meridian Health, Hackensack, NJ, United States

6Department of Health, Sport, and Exercise Sciences, University of Kansas, Lawrence, KS, United States

7 Department of Biostatistics, University of Kansas Medical Center, Kansas City, KS, United States

*** Correspondence:**Heather D. Gibbs
[hgibbs@kumc.edu](mailto:hgibbs@kumc.edu)

Table . Organization and Content of Nutricity, a Novel Mobile Nutrition Literacy Intervention

| Environment | Relevant Nutrition Literacy Constructs | Instructional Concepts Important to Construct | Educational Content | Practice/Skill Reinforcement |
| --- | --- | --- | --- | --- |
| Grocery Store | Food Label Reading  Consumer Skills | Finding nutrient information on food labels; Interpreting healthfulness of food labels; How to use ingredients lists | “Food Fits! Grocery Store Tour“ Video  Food Label Video (FDA) | Parents:Check Your Skills Quiz (choose between similar food items using product information, feedback provided)  Children: “Good Groceries“ game |
| Home | Nutrition & Health  Food Groups  Household Food Measurement  Feeding Behaviors | Understanding dietary guidelines and nutrition terms; Identifying food group categories; Building a healthy plate; Recommended portion sizes; “Division of Responsibility“ of parent/child eating roles | “Food Fits! Food Groups“ video  “Feeding Children Well“ Video | Parents: Check Your Skills Quiz (terms, food groups, division of responsibility; feedback provided)  Children: Interactive MyPlate game |
| Restaurant | Nutrition & Health  Food Groups  Household Food Measurement | Building a healthy plate at restaurants; Recommended portion sizes; Understanding menus | "Food Fits! Healthy Eating When Dining Out“ Video | Parents: Check Your Skills Quiz (menu selection)  Children: Find the Fruits & Veggies (Digital Seek & Find) |

Table . Content analysis of interviews with parent participants regarding thoughts on the Nutricity website.

| **Interview Question** | **Themes Uncovered by Interviews with Spanish Speakers (n=3)** | **Themes Uncovered by Interviews with English Speakers (n=3)** | **Potential Action/Implication** |
| --- | --- | --- | --- |
| Please tell us a little more on how useful you found the information to be in the Nutricity Website. | - Provided ideas for healthier food options - Taught how to build a meal with different food groups - Navigate grocery store shopping | - Provided ideas for healthier food options - Taught about food labels and food portions - Navigate grocery stores and restaurant menus | - Create user guide for website navigation - Focus more on food purchase and nutrition (grocery store and restaurant) |
| How engaging was the website? | - All content was engaging - Grocery store and food labels were most engaging - Games need to improve on children’s engagement | - All content was engaging - Food labels, food portions, parenting/eating skills were most engaging | - Improve on children’s game animation |
| How easy was the information to understand? | - Very easy to understand | - Very easy to understand | - No changes needed |
| Describe what you found to be the greatest benefit or advantage of using the Nutricity Website. | - Help to make healthier food choices - Access to nutrition information for children - Education on food labels | - Able to learn a lot in a short period of time. - Learn what and how to offer food to my child. - Increase awareness of choosing food and not choose only based on taste and craving. | - Fast and reliable source of nutrition education for parents and children |
| What did you find to be one of the disadvantages of using the Nutricity Website? | - None - Technical problem with one video | - None | - Improve accessibility on videos. |
| How would you rate the ease of navigating the website? (rating of 10 = very easy) Explain any problems you had while using the website. | - Rated 9.5 of 10 - Support to know where to start in the website - Improve format for children (options to select content beside drop down menus) | - Rated 10 of 10 - Understandable level for most children. | - Create user guide for website navigation - Improve interaction for young children. |
| How would you rate the quality of information in the website? (10=highest quality rating) | - Rated 9.3 of 10 | - Rated 10 of 10 | - NA |
| Describe how you used the website with your child. | - More interaction in the games. - Gave resource to teach children about nutrition and food. | - Parent select the topic and invite children to watch together - Child did not watch for long time (too young). | - Improve interaction on games for children. - Guide parents to play the games with children. |
| How would you rate your child’s level of engagement with the website? | - One rated 7.0 of 10 - Two did not have children present | - Little engaging - Engagement at home and older children may be different. | - Explore children’s abilities to play games alone vs. assisted by caregiver. |
| If you had access to the website, would you continue to use it? Why or why not? | - All would continue to use the website - Children learning about nutrition in an interactive way would spark curiosity to try new and healthy foods. | - All would continue to use the website. - Information about which foods and portion sizes to offer children. - Information for how to select food based on the food label. - Serve as a source of nutrition information in a way that is easy to access and understand. | - Source of nutrition education for children - Increase children’s curiosity of nutrition - Education on food quality, portion size, food purchase - Easy to access and understand. |
| What changes, if any, would you suggest to the website to make it more useful and engaging? | - More animation in the games - Images need to be bigger and bolder. - Have access through phone. | - No further changes. - Video to share information is preferred method. | - Improve game animation. - Improve image shape and format. - Provide access through phone - Provide more videos. |

**
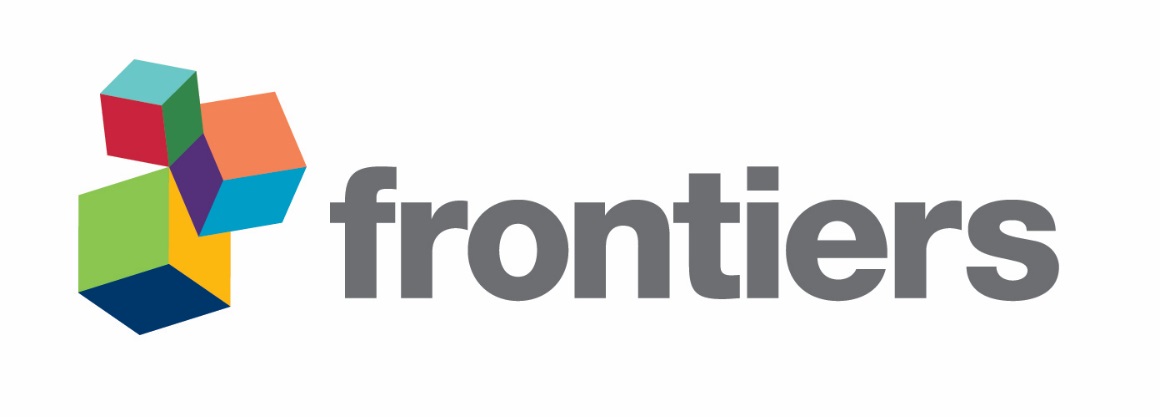
**
